# Supplementary material for: Improving the Antioxidant Activity and Flavor of Faba (Vicia faba L.) Leaves by Domestic Cooking Methods
Source: MDPI journal article supplement (doi:10.3390/antiox11050931), 2022-05-09
Supplement: s1 [file s1]

**Table S1.** Correlation coefficients between antioxidant activities and metabolite groups assembled with processed faba samples.

|                          |                | <i>L</i> -dopa | Flavonoids (Peak number) <sup>a</sup> |          |          |          |          |         |          |          |          |         |          |         | TPC      | TFC     | DPPH     | ABTS |
|--------------------------|----------------|----------------|---------------------------------------|----------|----------|----------|----------|---------|----------|----------|----------|---------|----------|---------|----------|---------|----------|------|
|                          |                |                | 1                                     | 2        | 3        | 4        | 5        | 6       | 7        | 8        | 9        | 10      | 11+12    | 13      |          |         |          |      |
| Flavonoids (Peak number) | <i>L</i> -dopa | 1              |                                       |          |          |          |          |         |          |          |          |         |          |         |          |         |          |      |
|                          | 1              | 0.230ns        | 1                                     |          |          |          |          |         |          |          |          |         |          |         |          |         |          |      |
|                          | 2              | 0.291ns        | 0.884***                              | 1        |          |          |          |         |          |          |          |         |          |         |          |         |          |      |
|                          | 3              | 0.559*         | 0.141ns                               | 0.128ns  | 1        |          |          |         |          |          |          |         |          |         |          |         |          |      |
|                          | 4              | 0.189ns        | -0.476ns                              | -0.339ns | 0.409ns  | 1        |          |         |          |          |          |         |          |         |          |         |          |      |
|                          | 5              | 0.234ns        | -0.198ns                              | -0.181ns | 0.509ns  | 0.625*   | 1        |         |          |          |          |         |          |         |          |         |          |      |
|                          | 6              | 0.214ns        | 0.248ns                               | 0.041ns  | -0.068ns | -0.378ns | -0.175ns | 1       |          |          |          |         |          |         |          |         |          |      |
|                          | 7              | 0.365ns        | 0.655**                               | 0.447ns  | 0.047ns  | -0.241ns | -0.272ns | 0.552*  | 1        |          |          |         |          |         |          |         |          |      |
|                          | 8              | 0.379ns        | 0.846***                              | 0.904*** | 0.306ns  | -0.169ns | 0.087ns  | 0.088ns | 0.48ns5  | 1        |          |         |          |         |          |         |          |      |
|                          | 9              | 0.514ns        | 0.656**                               | 0.494ns  | 0.048ns  | -0.335ns | -0.261ns | 0.607*  | 0.957*** | 0.496ns  | 1        |         |          |         |          |         |          |      |
|                          | 10             | 0.432ns        | 0.654**                               | 0.613*   | 0.205ns  | 0.101ns  | 0.044ns  | 0.102ns | 0.809*** | 0.637*   | 0.769*** | 1       |          |         |          |         |          |      |
|                          | 11+12          | 0.694**        | 0.491ns                               | 0.378ns  | 0.174ns  | -0.191ns | -0.187ns | 0.571*  | 0.836*** | 0.349ns  | 0.924*** | 0.673** | 1        |         |          |         |          |      |
|                          | 13             | 0.626*         | 0.689**                               | 0.741**  | 0.559*   | 0.158ns  | 0.326ns  | 0.190ns | 0.476ns  | 0.874*** | 0.498ns  | 0.652** | 0.498ns  | 1       |          |         |          |      |
| TPC                      |                | 0.958***       | 0.134ns                               | 0.162ns  | 0.488ns  | 0.141ns  | 0.140ns  | 0.225ns | 0.355ns  | 0.219ns  | 0.501ns  | 0.359ns | 0.717**  | 0.475ns | 1        |         |          |      |
| TFC                      |                | 0.488ns        | 0.283ns                               | 0.111ns  | 0.166ns  | -0.058ns | -0.308ns | 0.280ns | 0.736**  | 0.133ns  | 0.715**  | 0.588*  | 0.768*** | 0.218ns | 0.597*   | 1       |          |      |
| DPPH                     |                | 0.863***       | -0.084ns                              | -0.055ns | 0.388ns  | 0.257ns  | 0.381ns  | 0.299ns | 0.201ns  | 0.023ns  | 0.367ns  | 0.214ns | 0.613*   | 0.358ns | 0.854*** | 0.314ns | 1        |      |
| ABTS                     |                | 0.856***       | 0.110ns                               | 0.209ns  | 0.330ns  | 0.165ns  | 0.160ns  | 0.187ns | 0.305ns  | 0.257ns  | 0.452ns  | 0.357ns | 0.662**  | 0.487ns | 0.919*** | 0.495ns | 0.794*** | 1    |

Tukey's HSD test, \* indicates  $p < 0.05$ , \*\* indicates  $p < 0.01$ , \*\*\* indicates  $p < 0.001$ , and ns indicates no significance. <sup>a</sup> Peak identification is shown in Table 1.

**Table S2.** The volatile flavor profiles of faba leaves before and after domestic cooking.

| Identification                               | Rt<br>(min) | <i>m/z</i> | Treatment     |              |               |              |              |
|----------------------------------------------|-------------|------------|---------------|--------------|---------------|--------------|--------------|
|                                              |             |            | Fresh         | Microwave    | Roasting      | Steaming     | Boiling      |
| <b>Alcohols</b>                              |             |            | <b>72.02%</b> | <b>5.24%</b> | <b>10.37%</b> | <b>4.50%</b> | <b>1.65%</b> |
| Ethanol                                      | 9.18        | 46         | 2.11%         | 0.44%        | 0.25%         | 0.53%        | 0.11%        |
| 1-Propanol                                   | 11.84       | 60         | 0.02%         | 0.00%        | 0.00%         | 0.00%        | 0.00%        |
| 1-Penten-3-ol                                | 14.68       | 86         | 13.43%        | 0.47%        | 0.21%         | 0.12%        | 0.20%        |
| 1-Butanol                                    | 15.72       | 74         | 0.10%         | 0.04%        | 0.06%         | 0.00%        | 0.00%        |
| 1-Butanol, 3-methyl-                         | 15.74       | 88         | 0.40%         | 0.00%        | 0.00%         | 0.00%        | 0.00%        |
| 2-Penten-1-ol                                | 18.55       | 86         | 7.29%         | 0.15%        | 0.11%         | 0.06%        | 0.07%        |
| 1-Hexanol                                    | 19.41       | 102        | 2.52%         | 0.06%        | 0.13%         | 0.04%        | 0.01%        |
| 3-Hexen-1-ol                                 | 20.47       | 100        | 9.10%         | 0.12%        | 0.47%         | 0.20%        | 0.02%        |
| 2-Hexen-1-ol                                 | 21.07       | 100        | 5.54%         | 0.53%        | 0.68%         | 0.21%        | 0.12%        |
| 1-Octen-3-ol                                 | 22.4        | 128        | 23.55%        | 0.38%        | 2.83%         | 0.61%        | 0.06%        |
| 5-Hepten-2-ol, 6-methyl-                     | 22.85       | 128        | 1.35%         | 0.05%        | 0.12%         | 0.03%        | 0.00%        |
| 1-Octanol                                    | 26.43       | 130        | 0.23%         | 0.11%        | 0.29%         | 0.10%        | 0.03%        |
| Cyclooctyl alcohol                           | 28.93       | 128        | 0.56%         | 0.01%        | 0.11%         | 0.05%        | 0.00%        |
| Cyclohexanol, 4-(1-methylethyl)-             | 30.49       | 156        | 1.16%         | 0.06%        | 0.39%         | 0.10%        | 0.00%        |
| 1-Cyclohexene-1-methanol                     | 31.99       | 112        | 0.57%         | 0.01%        | 0.08%         | 0.06%        | 0.02%        |
| Geraniol                                     | 39.13       | 154        | 0.23%         | 0.02%        | 0.14%         | 0.05%        | 0.00%        |
| 5,9-Undecadien-2-one, 6,10-dimethyl-         | 39.65       | 194        | 0.15%         | 0.16%        | 0.12%         | 0.20%        | 0.11%        |
| Phenol, 3-methyl-6-propyl-                   | 39.74       | 150        | 0.14%         | 0.03%        | 0.00%         | 0.01%        | 0.00%        |
| Benzyl alcohol                               | 40.62       | 108        | 3.15%         | 0.21%        | 1.44%         | 0.76%        | 0.18%        |
| Butylated hydroxytoluene                     | 41.74       | 220        | 0.17%         | 2.16%        | 2.65%         | 1.19%        | 0.66%        |
| (Z)-4-Decen-1-ol                             | 41.74       | 156        | 0.00%         | 0.16%        | 0.16%         | 0.07%        | 0.04%        |
| Phenol                                       | 44.99       | 94         | 0.03%         | 0.03%        | 0.05%         | 0.03%        | 0.01%        |
| cis-2,3-Epoxycyclohexane-1-methanol          | 46.14       | 128        | 0.08%         | 0.00%        | 0.06%         | 0.05%        | 0.01%        |
| Benzyl alcohol                               | 46.2        | 108        | 0.03%         | 0.00%        | 0.00%         | 0.00%        | 0.00%        |
| Phenol, 2-methoxy-4-(2-propenyl)             | 49.74       | 164        | 0.08%         | 0.01%        | 0.03%         | 0.01%        | 0.00%        |
| Eugenol                                      | 50.46       | 164        | 0.03%         | 0.00%        | 0.00%         | 0.00%        | 0.00%        |
| <b>Aldehydes</b>                             |             |            | <b>14.44%</b> | <b>2.71%</b> | <b>1.75%</b>  | <b>1.01%</b> | <b>0.86%</b> |
| 2-Methylbutyraldehyde                        | 8.63        | 86         | 0.07%         | 0.88%        | 0.17%         | 0.01%        | 0.00%        |
| Hexanal                                      | 13.09       | 100        | 0.35%         | 0.22%        | 0.16%         | 0.05%        | 0.06%        |
| 2-Pentenal,(E)-                              | 14.32       | 84         | 0.59%         | 0.09%        | 0.10%         | 0.03%        | 0.04%        |
| 2-Hexenal, (E)-                              | 16.39       | 98         | 1.91%         | 0.11%        | 0.16%         | 0.06%        | 0.04%        |
| 2,4-Heptadienal                              | 24.79       | 110        | 4.18%         | 0.55%        | 0.24%         | 0.33%        | 0.52%        |
| 2,6-Nonadienal, (E,Z)                        | 28.33       | 138        | 2.08%         | 0.08%        | 0.09%         | 0.08%        | 0.07%        |
| 1-Cyclohexene-1-carboxaldehyde, 2,6,6-trimet | 30.08       | 152        | 0.62%         | 0.34%        | 0.18%         | 0.10%        | 0.04%        |
| Benzeneacetaldehyde                          | 31.02       | 120        | 3.77%         | 0.43%        | 0.62%         | 0.31%        | 0.07%        |
| 4-Heptenal,(Z)                               | 32.27       | 112        | 0.41%         | 0.00%        | 0.00%         | 0.00%        | 0.00%        |
| 2,4-Decadienal,(E,E)                         | 38.19       | 152        | 0.18%         | 0.02%        | 0.04%         | 0.04%        | 0.01%        |
| 3-Cyclohex-1-enyl-prop-                      | 41.45       | 139        | 0.30%         | 0.00%        | 0.00%         | 0.00%        | 0.00%        |

|                                                                  |       |     |              |               |              |              |              |
|------------------------------------------------------------------|-------|-----|--------------|---------------|--------------|--------------|--------------|
| 2-enal-1                                                         |       |     |              |               |              |              |              |
| <b>Alkanes</b>                                                   |       |     | <b>0.37%</b> | <b>10.03%</b> | <b>6.95%</b> | <b>0.71%</b> | <b>0.79%</b> |
| 2,2-Dimethyldecane                                               | 9.34  | 170 | 0.03%        | 0.92%         | 0.69%        | 0.09%        | 0.10%        |
| Decane                                                           | 10.59 | 142 | 0.10%        | 4.20%         | 1.96%        | 0.18%        | 0.22%        |
| Octane, 3,3-dimethyl-                                            | 10.79 | 142 | 0.03%        | 1.21%         | 0.70%        | 0.07%        | 0.08%        |
| Heptane, 3,3,5-trimethyl-                                        | 10.97 | 100 | 0.06%        | 1.10%         | 1.22%        | 0.13%        | 0.16%        |
| Dodecane                                                         | 15.38 | 170 | 0.14%        | 2.60%         | 2.38%        | 0.24%        | 0.23%        |
| <b>Alkenes</b>                                                   |       |     | <b>0.15%</b> | <b>0.09%</b>  | <b>1.16%</b> | <b>0.91%</b> | <b>0.99%</b> |
| $\alpha$ -PINENE                                                 | 11.44 | 136 | 0.06%        | 0.03%         | 0.71%        | 0.47%        | 0.39%        |
| <i>trans</i> -Caryophyllene                                      | 29.01 | 204 | 0.05%        | 0.03%         | 0.20%        | 0.17%        | 0.23%        |
| $\alpha$ -Amorphene                                              | 32.81 | 204 | 0.02%        | 0.01%         | 0.12%        | 0.13%        | 0.17%        |
| $\delta$ -Cadinene                                               | 35.84 | 204 | 0.02%        | 0.02%         | 0.12%        | 0.14%        | 0.20%        |
| <b>Aromatic hydrocarbons</b>                                     |       |     | <b>0.03%</b> | <b>3.56%</b>  | <b>0.09%</b> | <b>0.03%</b> | <b>0.04%</b> |
| <i>p</i> -Xylene                                                 | 14.59 | 106 | 0.03%        | 1.61%         | 0.07%        | 0.01%        | 0.03%        |
| Naphthalene, 1,2,3,4-tetrahydro-1,1,6-trimethyl                  | 33.14 | 174 | 0.00%        | 0.44%         | 0.01%        | 0.01%        | 0.01%        |
| Naphthalene, 1,2-dihydro-1,1,6-trimethyl-                        | 35.65 | 172 | 0.00%        | 1.51%         | 0.02%        | 0.00%        | 0.00%        |
| <b>Esters</b>                                                    |       |     | <b>2.89%</b> | <b>1.99%</b>  | <b>1.61%</b> | <b>1.06%</b> | <b>1.12%</b> |
| Butyrolactone                                                    | 30.76 | 86  | 0.04%        | 0.57%         | 0.30%        | 0.02%        | 0.00%        |
| Benzoic acid, 2-hydroxy-,methyl ester                            | 37.1  | 174 | 0.50%        | 0.47%         | 0.34%        | 0.33%        | 0.48%        |
| Nonanoic acid, 9-oxo-,methyl ester                               | 46.48 | 186 | 0.28%        | 0.03%         | 0.05%        | 0.00%        | 0.00%        |
| Methyl 13-methyltetradecanoate                                   | 47.87 | 256 | 0.03%        | 0.01%         | 0.02%        | 0.00%        | 0.00%        |
| Hexadecanoic acid, methyl ester                                  | 50.66 | 270 | 1.73%        | 0.35%         | 0.33%        | 0.25%        | 0.24%        |
| Methyl 8,11,14-heptadecatrienoate                                | 59.59 | 278 | 0.31%        | 0.56%         | 0.56%        | 0.45%        | 0.40%        |
| <b>Ketones</b>                                                   |       |     | <b>4.78%</b> | <b>0.94%</b>  | <b>0.51%</b> | <b>0.29%</b> | <b>0.29%</b> |
| 1-Penten-3-one                                                   | 11.56 | 84  | 2.30%        | 0.21%         | 0.14%        | 0.05%        | 0.05%        |
| 4-Methyl-2-heptanone                                             | 18.35 | 128 | 0.18%        | 0.00%         | 0.00%        | 0.00%        | 0.00%        |
| 3,5-Octadien-2-one                                               | 25.58 | 124 | 0.76%        | 0.17%         | 0.04%        | 0.03%        | 0.03%        |
| 3-Nonen-2-one                                                    | 29.02 | 140 | 0.00%        | 0.00%         | 0.04%        | 0.04%        | 0.05%        |
| 2,5-Dimethyl-4-hydroxy-3(2H)-furanone                            | 40.09 | 128 | 0.00%        | 0.28%         | 0.14%        | 0.00%        | 0.00%        |
| 3-Buten-2-one, 4-(2,2,6-trimethyl-7-oxabicyclo[4.1.0]hept-1-yl)- | 44.75 | 208 | 1.54%        | 0.27%         | 0.16%        | 0.17%        | 0.16%        |
| <b>Organic acids</b>                                             |       |     | <b>2.01%</b> | <b>0.65%</b>  | <b>2.26%</b> | <b>0.91%</b> | <b>0.22%</b> |
| Hexanoic acid                                                    | 39.37 | 116 | 0.86%        | 0.24%         | 0.60%        | 0.56%        | 0.19%        |
| 3-Hexenoic acid, (E)-                                            | 43.64 | 114 | 0.26%        | 0.07%         | 0.43%        | 0.07%        | 0.00%        |
| 2-Hexenoic acid                                                  | 43.91 | 114 | 0.67%        | 0.16%         | 1.06%        | 0.20%        | 0.00%        |
| Octanoic acid                                                    | 46.51 | 144 | 0.22%        | 0.17%         | 0.17%        | 0.08%        | 0.03%        |
| <b>Others</b>                                                    |       |     | <b>3.31%</b> | <b>4.32%</b>  | <b>3.41%</b> | <b>2.47%</b> | <b>3.08%</b> |
| (3R)-3-Phenyl-2,3-dihydro-1H-isoindol-1-one                      | 6.5   | 251 | 1.96%        | 3.76%         | 2.77%        | 2.00%        | 1.87%        |
| 1-Butene, 2-(chloromethyl)-                                      | 11.21 | 105 | 0.47%        | 0.14%         | 0.19%        | 0.13%        | 0.17%        |
| <i>N</i> -benzylidene-                                           | 26.21 | 340 | 0.38%        | 0.36%         | 0.34%        | 0.24%        | 1.03%        |

|                                           |       |     |       |       |       |       |       |
|-------------------------------------------|-------|-----|-------|-------|-------|-------|-------|
| dimethylammonium<br>chloride              |       |     |       |       |       |       |       |
| 1H-Pyrrole-2,5-dione,3-<br>ethyl-4-methyl | 52.36 | 139 | 0.50% | 0.06% | 0.12% | 0.09% | 0.02% |

The data are as presented in percentage for each volatile under total peak area of fresh conditions. Values in bold type are the totals within each compound group.
